# Supplementary material for: Circulating HMGB1 is elevated in veterans with Gulf War Illness and triggers the persistent pro-inflammatory microglia phenotype in male C57Bl/6J mice
Source: PubMed Central journal article supplement (PMC8275600; doi:10.1038/s41398-021-01517-1), 2021-07-12

**A.**

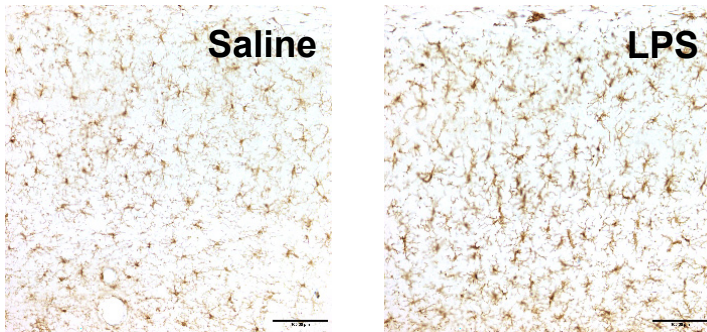

**B.**

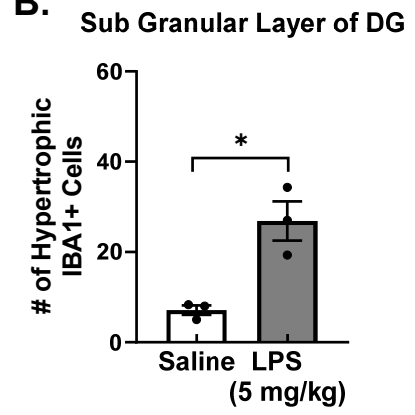

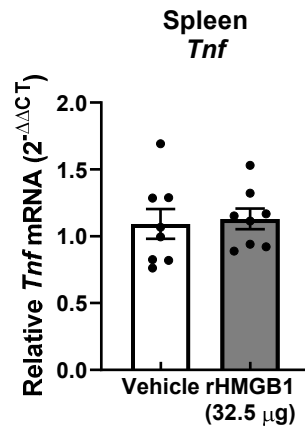

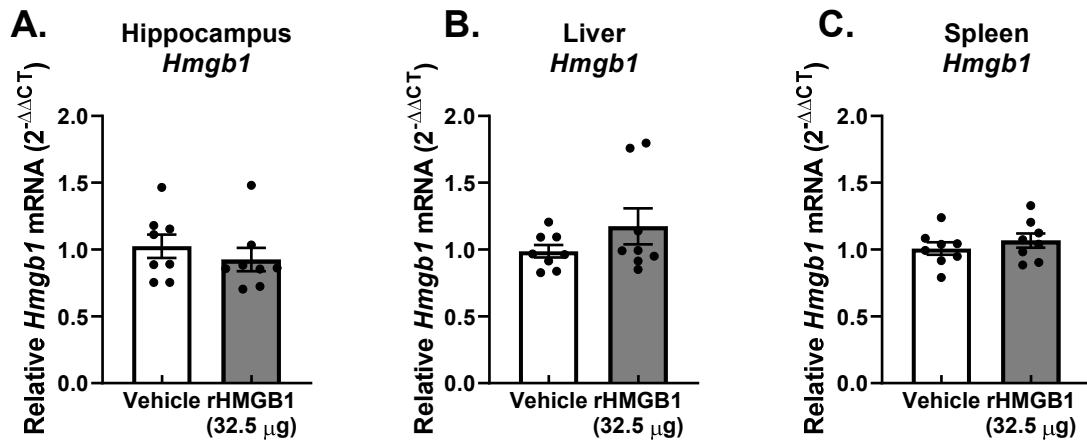

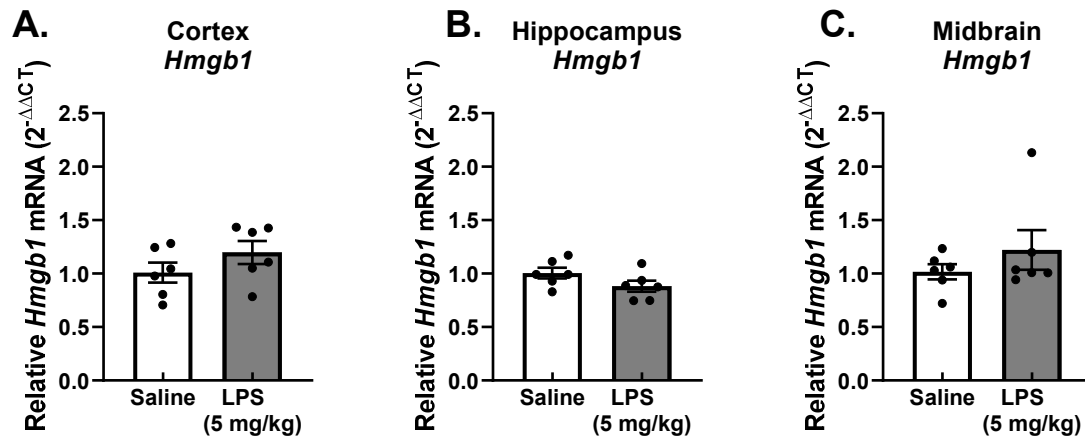

A.

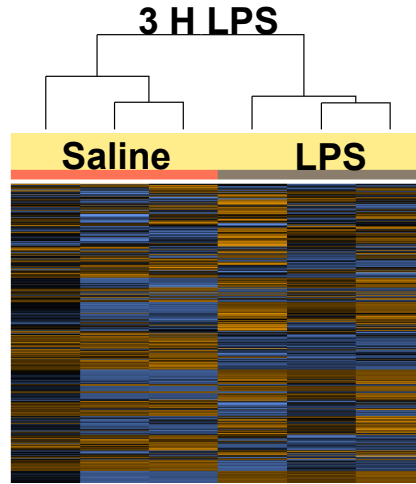

B.

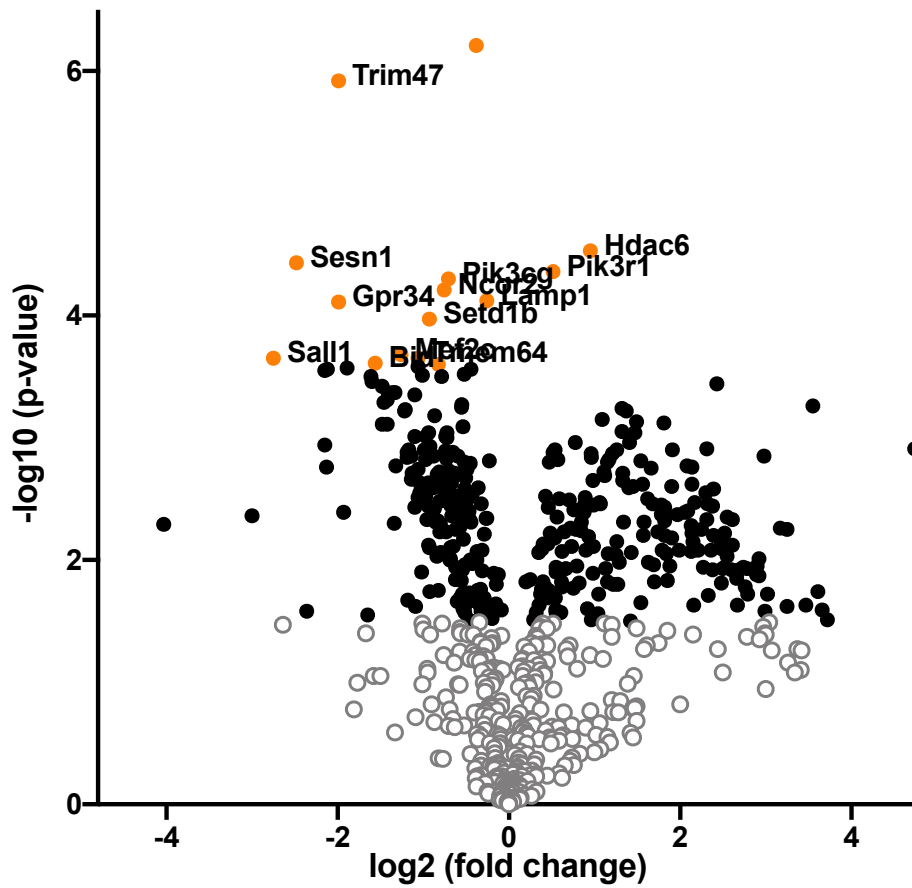

Supplement: 41398_2021_1517_MOESM3_ESM.pdf [file 41398_2021_1517_MOESM3_ESM.pdf]
